# Supplementary material for: Dihydromyricetin improves meat quality and promotes skeletal muscle fiber type transformations via AMPK signaling in growing–finishing pigs
Source: Royal Society of Chemistry journal article supplement (doi:10.1039/d1fo03391c), 2022-01-01
Supplement: d1fo03391c1.pdf [file d1fo03391c1.pdf]

**Table S1.** Ingredient composition and nutrient levels of the basal diet

| Ingredient and nutritive level   | 25-65 kg | 65 kg-slaughter |
|----------------------------------|----------|-----------------|
| Ingredient (%)                   |          |                 |
| Corn                             | 74.92    | 81.70           |
| Soybean meal                     | 17.44    | 11.10           |
| Soybean oil                      | 2.28     | 2.36            |
| Fishmeal                         | 2.50     | -               |
| Wheat bran                       | -        | 2.10            |
| L-lysine HCl                     | 0.41     | 0.40            |
| DL-Methionine                    | 0.13     | 0.10            |
| L-Threonine                      | 0.15     | 0.14            |
| L-Tryptophan                     | 0.03     | 0.03            |
| Choline chloride                 | 0.15     | 0.15            |
| Limestone                        | 0.76     | 0.71            |
| CaHPO <sub>4</sub>               | 0.70     | 0.68            |
| NaCl                             | 0.30     | 0.30            |
| Mineral premix <sup>1</sup>      | 0.20     | 0.20            |
| Vitamin premix <sup>2</sup>      | 0.03     | 0.03            |
| Total                            | 100.00   | 100.00          |
| Nutrient level (%)               |          |                 |
| Digestible energy (Mcal/kg)      | 3.40     | 3.40            |
| Crude protein                    | 15.71    | 12.14           |
| Calcium                          | 0.68     | 0.54            |
| Available P                      | 0.32     | 0.24            |
| Digestible lysine                | 0.98     | 0.73            |
| Digestible Methionine + Cysteine | 0.55     | 0.42            |
| Digestible Threonine             | 0.59     | 0.46            |
| Digestible Tryptophan            | 0.17     | 0.13            |

<sup>1</sup> Mineral premix provides per kg of basal diet:

25-65kg: Se 0.2 mg, I 0.14 mg, Zn 60 mg, Cu 4 mg, Fe 60 mg, Mn 2 mg;

65kg-slaughter: Se 0.15 mg, I 0.14 mg, Zn 50 mg, Cu 3 mg, Fe 40 mg, Mn 2 mg.

<sup>2</sup> Vitamin premix provides per kg of basal diet: Vitamin A, 9000 IU; Vitamin D<sub>3</sub>, 3000 IU; Vitamin E, 24 IU; Vitamin K<sub>3</sub>, 3.0 mg; Vitamin B<sub>12</sub>, 0.036 mg; Vitamin B<sub>1</sub>, 3 mg; Vitamin B<sub>6</sub>, 3.6 mg; Vitamin B<sub>2</sub>, 7.5 mg; Vitamin B<sub>5</sub>, 15 mg; Folic acid, 1.5 mg; Biotin, 0.15 mg; Nicotinamide, 30 mg.

| Genes                           | Sequence                         | GenBank accession no. |
|---------------------------------|----------------------------------|-----------------------|
| <i>GAPDH</i>                    | F:5'-ACTCACTCTTCTACCTTTGATGCT-3' | NM_001206359.1        |
|                                 | R:5'-TGTTGCTGTAGCCAAATTCA-3'     |                       |
| <i>MyHC I</i>                   | F:5'-CGTGGACTACAACATCATAGGC-3'   | NM_213855             |
|                                 | R:5'-CCTTCTCAACAGGTGTGTCG-3'     |                       |
| <i>MyHC IIa</i>                 | F:5'-CATTGAGGCCAAGAATAGGC-3'     | NM_214136             |
|                                 | R:5'-TGCTTCCGTCTTCACTGTCAC-3'    |                       |
| <i>MyHC IIb</i>                 | F:5'-GACTCTGGCTTTCCTCTTTGC-3'    | NM_001123141          |
|                                 | R:5'-GAGCTGACACGGTCTGGAAA-3'     |                       |
| <i>MyHC IIx</i>                 | F:5'-TTGACTGGGCTGCCATCAAT-3'     | NM_001104951          |
|                                 | R:5'-GCCTCAATGCGCTCCTTTTC-3'     |                       |
| <i>Myoglobin</i>                | F:5'-GGAAGGTGGAGGCTGATGTC-3'     | NM_214236             |
|                                 | R:5'-CCGTGCTTCTTCAGGTCCTC-3'     |                       |
| <i>AMPK<math>\alpha</math>1</i> | F:5'-CGGCAAAGTGAAGGTTGG-3'       | NM_001167633          |
|                                 | R:5'-AGGTTCTGAATTTCTCTGCGG-3'    |                       |
| <i>AMPK<math>\alpha</math>2</i> | F:5'-TGAGGTCGATATCTGGAGCTG-3'    | NM_214266             |
|                                 | R:5'-AGTGGCAACAGAACGATTGAG-3'    |                       |
| <i>CaMKK<math>\beta</math></i>  | F:5'-CAGCTCCCCTCATTAGGGT-3'      | XM_021073030.1        |
|                                 | R:5'-CAGCTCACGCCACCAATTA-3'      |                       |
| <i>NRF1</i>                     | F:5'-CCTTGTGGTGGGAGGAATGTT-3'    | XM_005657993          |
|                                 | R:5'-AGTATGCTGGCTGACCTTGTG-3'    |                       |

**Table S2.** Primers used in real-time quantitative PCR
